# Supplementary material for: Design, implementation, and evaluation of the computer-aided clinical decision support system based on learning-to-rank: collaboration between physicians and machine learning in the differential diagnosis process
Source: Springer Nature journal article supplement (doi:10.1186/s12911-023-02123-5), 2023-02-02
Supplement: MOESM2 [file 23984570]

## Title

Additional information of evaluation results

## Title of main manuscript

Design, Implementation, and Evaluation of the Computer-aided Clinical Decision Support System based on Learning-to-Rank:  
Collaboration between physicians and machine learning in the differential diagnosis process

## Version

- 2023013001

## Contact Information

- <https://www.diagnosis.or.jp/>
- [mailto: ai.doagnosis.2021@gmail.com](mailto:ai.doagnosis.2021@gmail.com)

## Evaluation: Differential Diagnosis performance

### Evaluation results and Discussion

#### Disease with characteristic symptoms

Cited case:

- Acute intermittent porphyria [25]

Table 1 shows the Inputted symptoms and predicted diseases: case of the acute intermittent porphyria.

Table 2 shows the Inputted symptoms and the target disease's ranking: case of the acute intermittent porphyria.

#### Difficult-to-diagnose case with few characteristic symptoms

Cited case:

- Acute HIV-1 infection [26]

Table 3 shows the Inputted symptoms and predicted diseases: case of the acute HIV-1 infection.

Table 4 shows the Inputted symptoms and the target disease's ranking: case of the acute HIV-1 infection.

#### Case with diagnostic errors

Cited case:

- Subacute bacterial endocarditis caused by bartonella [27]

Table 5 shows the Inputted symptoms and predicted diseases: case of the subacute bacterial endocarditis caused by bartonella: In progress: n = 5.

Table 6 shows the Inputted symptoms and predicted diseases: case of the subacute bacterial endocarditis caused by bartonella: In progress: n = 9.

Table 7 shows the Inputted symptoms and predicted diseases: case of the subacute bacterial endocarditis caused by bartonella: In progress: n = 14.

Table 8 shows the Inputted symptoms and predicted diseases: case of the subacute bacterial endocarditis caused by bartonella: Final: n = 18.

Figures and Tables

**Table 1 Inputted symptoms and predicted diseases: case of the acute intermittent porphyria**

| Inputted symptoms |                             | Predicted diseases |        |                                                  | MSE  |                                                        |
|-------------------|-----------------------------|--------------------|--------|--------------------------------------------------|------|--------------------------------------------------------|
|                   |                             |                    | A-NDCG |                                                  |      |                                                        |
| a                 | Abdominal pain              | 1                  | 1.41   | <b>Acute intermittent porphyria</b>              | 9.25 | <b>Acute intermittent porphyria</b>                    |
| b                 | Constipation                | 2                  | 1.21   | Diabetic coma imminent state                     | 8.17 | Enterohemorrhagic e. coli (EHEC) infection             |
| c                 | Hyponatremia                | 3                  | 0.56   | Pesticide poisoning,<br>Organophosphate toxicity | 7.64 | Visceral rupture                                       |
| d                 | Abdominal tenderness        | 4                  | 0.51   | Lead poisoning (almost chronic)                  | 7.56 | Fibromyalgia (fibrositis)                              |
| e                 | Elevated serum liver enzyme | 5                  | 0.45   | Heat stroke (hyperthermia)                       | 7.53 | Cancerous peritonitis                                  |
| f                 | Tachycardia                 | → 6                | 0.31   | Cytomegalovirus infection                        | 7.29 | Withdrawal symptoms of alcohol and drugs               |
| g                 | Photophobia                 | 7                  | 0.25   | Visceral rupture                                 | 7.28 | Colorectal cancer                                      |
| h                 | Thirsty                     | 8                  | 0.16   | Hyponatremia                                     | 7.26 | Irritable bowel syndrome,<br>Functional dyspepsia (FD) |
| i                 | Borborygmus                 | 9                  | 0.13   | Portal vein obstruction                          | 7.23 | Drugs (laxatives, etc.)                                |
| j                 | Dehydration                 | 10                 | 0.12   | Acetaminophen poisoning                          | 7.07 | Eating disorder                                        |
| k                 | Confusion                   |                    |        | ...                                              |      |                                                        |

Cited case: Acute intermittent porphyria [25]

Loss functions: A-NDCG: Approximate NDCG loss

MSE: Mean Squared Error

**Table 2 Inputted symptoms and the target disease's ranking: case of the acute intermittent porphyria**

| Inputted symptoms             | Target disease | Ranking |     |
|-------------------------------|----------------|---------|-----|
|                               |                | AIP     | MSE |
|                               | Loss functions | A-NDCG  |     |
| a Abdominal pain              |                |         | --- |
| b Constipation                | →              |         | --- |
| c Hyponatremia                |                |         | 1   |
| d Abdominal tenderness        | →→             |         | 1   |
| e Elevated serum liver enzyme |                |         | 1   |
| f Tachycardia                 | →→→            |         | 1   |
| g Photophobia                 |                |         | 1   |
| h Thirsty                     | →→→→           |         | 1   |
| i Borborygmus                 |                |         | 1   |
| j Dehydration                 | →→→→→          |         | 1   |
| k Confusion                   |                |         | 1   |

Cited case: Acute intermittent porphyria [25]  
 Target disease: AIP: acute intermittent porphyria  
 Loss functions: A-NDCG: Approximate NDCG loss  
 MSE: Mean Squared Error  
 ---: 20th and lower

**Table 3 Inputted symptoms and predicted diseases: case of the acute HIV-1 infection**

| Inputted symptoms |                               |     | Predicted diseases |                               | MSE   |                              |
|-------------------|-------------------------------|-----|--------------------|-------------------------------|-------|------------------------------|
|                   |                               |     | A-NDCG             |                               |       |                              |
| a                 | Fever                         | 1   | 1.61               | <b>Acute HIV-1 infection</b>  | 10.16 | Epidemic hepatitis A         |
| b                 | Headache                      | 2   | 1.51               | Polyneuropathy                | 9.93  | Acute Q fever                |
| c                 | Sore throat                   | 3   | 0.91               | <b>Acute viral meningitis</b> | 9.75  | Acute pharyngitis            |
| d                 | Consciousness indistinctness  | 4   | 0.88               | West Nile fever               | 9.66  | Polyneuropathy               |
| e                 | Chills                        | 5   | 0.77               | Cat-scratch disease           | 9.28  | Lymphocytic choriomeningitis |
| f                 | Muscles ache                  | 6   | 0.46               | Acute Q fever                 | 9.17  | Herpes labialis              |
| g                 | Swallowing pain               | → 7 | 0.23               | Epidemic hepatitis A          | 8.99  | Side effects of interferon   |
| h                 | Pharyngolaryngeal abnormality | 8   | 0.21               | Chronic fatigue syndrome      | 8.86  | Sepsis                       |
| i                 | Aphasia                       | 9   | 0.13               | Sepsis                        | 8.74  | Chronic fatigue syndrome     |
| j                 | Apraxia                       | 10  | 0.12               | Toxoplasmosis                 | 8.73  | Retropharyngeal infection    |
| k                 | Fatigue                       |     |                    | ...                           |       |                              |
| l                 | Muscle weakness               |     |                    |                               |       |                              |
| m                 | Anorexia                      |     |                    |                               |       |                              |
| n                 | Weight loss                   |     |                    |                               |       |                              |
| o                 | Dementia                      |     |                    |                               |       |                              |

Cited case: Acute HIV-1 infection [26]

Loss functions: A-NDCG: Approximate NDCG loss

MSE: Mean Squared Error

**Table 4 Inputted symptoms and the target disease's ranking: case of the acute HIV-1 infection**

| Inputted symptoms |                               | Ranking         |        |     |        |     |
|-------------------|-------------------------------|-----------------|--------|-----|--------|-----|
|                   |                               | Target diseases | HIV-1  |     | AVM    |     |
|                   |                               | Loss functions  | A-NDCG | MSE | A-NDCG | MSE |
| a                 | Fever                         |                 |        | --- | ---    | --- |
| b                 | Headache                      |                 |        | --- | ---    | 9   |
| c                 | Sore throat                   |                 |        | 14  | ---    | 10  |
| d                 | Consciousness indistinctness  | →               |        | --- | ---    | 3   |
| e                 | Chills                        |                 |        | --- | ---    | 2   |
| f                 | Muscles ache                  | →→              |        | --- | ---    | 3   |
| g                 | Swallowing pain               |                 |        | 14  | ---    | 5   |
| h                 | Pharyngolaryngeal abnormality | →→→             |        | --- | ---    | 9   |
| i                 | Aphasia                       |                 |        | --- | ---    | 6   |
| j                 | Apraxia                       | →→→→            |        | --- | ---    | 2   |
| k                 | Fatigue                       |                 |        | --- | ---    | 2   |
| l                 | Muscle weakness               | →→→→→           |        | 12  | ---    | 2   |
| m                 | Anorexia                      |                 |        | 12  | ---    | 1   |
| n                 | Weight loss                   |                 |        | 1   | ---    | 3   |
| o                 | Dementia                      |                 |        | 1   | ---    | 3   |

Cited case: Acute HIV-1 infection [26]

Target diseases: HIV-1: acute HIV-1 infection

AVM: acute viral meningitis

Loss functions: A-NDCG: Approximate NDCG loss

MSE: Mean Squared Error

---: 20th and lower

**Table 5 Inputted symptoms and predicted diseases: case of the subacute bacterial endocarditis caused by bartonella: In progress: n = 5**

| Inputted symptoms |              |     |      | Predicted diseases                             | Classification  |
|-------------------|--------------|-----|------|------------------------------------------------|-----------------|
| a                 | Weight loss  | 1   | 0.78 | Hodgkin lymphoma                               |                 |
| b                 | Itching      | 2   | 0.60 | Heart tumor                                    |                 |
| c                 | Fatigue      | 3   | 0.41 | Mitral valve stenosis                          |                 |
| d                 | Tachypnea    | 4   | 0.32 | <b>Infectious endocarditis</b>                 | Related disease |
| e                 | Heart murmur | 5   | 0.17 | Aortic stenosis                                |                 |
|                   |              | 6   | 0.16 | Acute Q fever                                  |                 |
|                   |              | 7   | 0.04 | Hyperthyroidism                                |                 |
|                   |              | 8   | 0.03 | Immunoblastic lymphadenopathy                  |                 |
|                   |              | → 9 | 0.03 | Hepatic amyloidosis                            |                 |
|                   |              | 10  | 0.03 | Hashimoto's disease and autoimmune thyroiditis |                 |
|                   |              |     |      | ...                                            |                 |

Cited case: Subacute bacterial endocarditis caused by bartonella [27]

Loss functions: A-NDCG: Approximate NDCG loss

In progress: Number of inputted symptoms = 5

**Table 6 Inputted symptoms and predicted diseases: case of the subacute bacterial endocarditis caused by bartonella: In progress: n = 9**

| Inputted symptoms |                             | Predicted diseases |      | Classification                                |                                        |                 |
|-------------------|-----------------------------|--------------------|------|-----------------------------------------------|----------------------------------------|-----------------|
| a                 | Weight loss                 | 1                  | 1.61 | Zieve syndrome                                |                                        |                 |
| b                 | Itching                     | 2                  | 1.35 | Disseminated intravascular coagulation        |                                        |                 |
| c                 | Fatigue                     | 3                  | 0.94 | Chronic hepatitis                             |                                        |                 |
| d                 | Tachypnea                   | 4                  | 0.77 | Wilson's disease                              |                                        |                 |
| e                 | Heart murmur                | 5                  | 0.76 | Acute hepatitis                               |                                        |                 |
| f                 | Purpura                     | 6                  | 0.69 | Hepatic amyloidosis                           |                                        |                 |
| g                 | Anemia                      | 7                  | 0.59 | <b>Infectious endocarditis</b>                | Related disease                        |                 |
| h                 | Elevated serum liver enzyme | 8                  | 0.59 | (Compensated / uncompensated) liver cirrhosis |                                        |                 |
| i                 | Hyperbilirubinemia          | →                  | 9    | 0.53                                          | <b>Subacute bacterial endocarditis</b> | Related disease |
|                   |                             |                    | 10   | 0.53                                          | Gastric cancer                         |                 |
|                   |                             |                    |      | ...                                           |                                        |                 |

Cited case: Subacute bacterial endocarditis caused by bartonella [27]

Loss functions: A-NDCG: Approximate NDCG loss

In progress: Number of inputted symptoms = 9



**Table 7 Inputted symptoms and predicted diseases: case of the subacute bacterial endocarditis caused by bartonella: In progress: n = 14**

| Inputted symptoms |                             | Predicted diseases |      | Classification                                     |                          |  |
|-------------------|-----------------------------|--------------------|------|----------------------------------------------------|--------------------------|--|
| a                 | Weight loss                 | 1                  | 1.78 | <b>Subacute bacterial endocarditis</b>             | Related disease          |  |
| b                 | Itching                     | 2                  | 1.35 | Hepatic amyloidosis                                |                          |  |
| c                 | Fatigue                     | 3                  | 1.32 | Chronic hepatitis                                  |                          |  |
| d                 | Tachypnea                   | 4                  | 1.29 | <b>Infectious endocarditis</b>                     | Related disease          |  |
| e                 | Heart murmur                | 5                  | 1.16 | Disseminated intravascular coagulation             |                          |  |
| f                 | Purpura                     | 6                  | 1.15 | <i>Mixed cryoglobulinemia</i>                      | Misdiagnosed disease     |  |
| g                 | Anemia                      | 7                  | 1.10 | <b>Acute bacterial endocarditis</b>                | Related disease          |  |
| h                 | Elevated serum liver enzyme | 8                  | 0.99 | Idiopathic (or secondary) retroperitoneal fibrosis |                          |  |
| i                 | Hyperbilirubinemia          | →                  | 9    | 0.98                                               | Tuberculosis or syphilis |  |
| j                 | ESR elevation               | 10                 | 0.90 | Thrombotic thrombocytopenic purpura                |                          |  |
| k                 | RA/RF positive              |                    |      | ...                                                |                          |  |
| l                 | Hematuria                   |                    |      |                                                    |                          |  |
| m                 | Bacteriuria                 |                    |      |                                                    |                          |  |
| n                 | Proteinuria                 |                    |      |                                                    |                          |  |

Cited case: Subacute bacterial endocarditis caused by bartonella [27]

Loss functions: A-NDCG: Approximate NDCG loss

In progress: Number of inputted symptoms = 14

**Table 8 Inputted symptoms and predicted diseases: case of the subacute bacterial endocarditis caused by bartonella: Final: n = 18**

| Inputted symptoms |                             | Predicted diseases |                                                      | Classification                   |  |
|-------------------|-----------------------------|--------------------|------------------------------------------------------|----------------------------------|--|
| a                 | Weight loss                 | 1                  | 2.70 <i>Mixed cryoglobulinemia</i>                   | Misdiagnosed disease             |  |
| b                 | Itching                     | 2                  | 2.62 Chronic hepatitis                               |                                  |  |
| c                 | Fatigue                     | 3                  | 2.03 <b>Subacute bacterial endocarditis</b>          | Related disease                  |  |
| d                 | Tachypnea                   | 4                  | 1.48 Hepatic amyloidosis                             |                                  |  |
| e                 | Heart murmur                | 5                  | 1.47 Rapidly progressive glomerulonephritis syndrome |                                  |  |
| f                 | Purpura                     | 6                  | 1.34 <b>Acute bacterial endocarditis</b>             | Related disease                  |  |
| g                 | Anemia                      | 7                  | 1.27 <b>Infectious endocarditis</b>                  | Related disease                  |  |
| h                 | Elevated serum liver enzyme | 8                  | 0.94 Polyarteritis nodosa                            |                                  |  |
| i                 | Hyperbilirubinemia          | →                  | 9                                                    | 0.78 Autoimmune hemolytic anemia |  |
| j                 | ESR elevation               | 10                 | 0.75 Disseminated intravascular coagulation          |                                  |  |
| k                 | RA/RF positive              |                    | ...                                                  |                                  |  |
| l                 | Hematuria                   |                    |                                                      |                                  |  |
| m                 | Bacteriuria                 |                    |                                                      |                                  |  |
| n                 | Proteinuria                 |                    |                                                      |                                  |  |
| o                 | Hypocomplementemia          |                    |                                                      |                                  |  |
| p                 | Angiitis                    |                    |                                                      |                                  |  |
| q                 | Nephritis                   |                    |                                                      |                                  |  |
| r                 | Animal Origin Infections    |                    |                                                      |                                  |  |

Cited case: Subacute bacterial endocarditis caused by bartonella [27]

Loss functions: A-NDCG: Approximate NDCG loss

Final: Number of inputted symptoms = 18
